# Supplementary material for: Comparative transcriptome profiling suggests the role of phytohormones in leaf stalk-stem angle in melon (Cucumis melo L.)
Source: PeerJ. 2024 Nov 18;12:e18467. doi: 10.7717/peerj.18467 (PMC11580662; doi:10.7717/peerj.18467)
Supplement: Supplemental Information 2 [file peerj-12-18467-s002.xlsx]

## Sheet: Plant hormone content
Group	Sample volume	MEJA	6-BA	Kt	IPA	BR	IP	TZR	MT	CZ	TZ	DZ	Me-IAA	IBA	IAA	ACC	GR24	GA3	GA1	GA4	ABA	GA7	GA5	GA19	GA24	JA-Ile	SAG	GA51	JA	GA8	DHJA	SA	ICA	ICAId	OPDA
	Sample volume
		Unit（ng/g）	Unit（ng/g）	Unit（ng/g）	Unit（ng/g）	Unit（ng/g）	Unit（ng/g）	Unit（ng/g）	Unit（ng/g）	Unit（ng/g）	Unit（ng/g）	Unit（ng/g）	Unit（ng/g）	Unit（ng/g）	Unit（ng/g）	Unit（ng/g）	Unit（ng/g）	Unit（ng/g）	Unit（ng/g）	Unit（ng/g）	Unit（ng/g）	Unit（ng/g）	Unit（ng/g）	Unit（ng/g）	Unit（ng/g）	Unit（ng/g）	Unit（ng/g）	Unit（ng/g）	Unit（ng/g）	Unit（ng/g）	Unit（ng/g）	Unit（ng/g）	Unit（ng/g）	Unit（ng/g）	Unit（ng/g）
Z151_1	40.9mg	ND	ND	ND	49.8684	ND	1.5066	22.4025	ND	1.0983	4.4466	ND	0.8946	ND	6.1987	4855.91	ND	ND	ND	ND	107.175	2.908	ND	ND	3.837	15.1595	21390.8	ND	ND	10.6739	ND	410.736	23.7379	20.9141	59.5178
Z151_2	39.3mg	ND	ND	ND	60.2054	ND	1.8042	35.6805	ND	1.2377	6.0687	ND	1.0308	ND	12.1831	5372.98	ND	ND	ND	ND	126.398	2.865	ND	ND	ND	3.8353	23227.7	ND	ND	4.9212	ND	761.376	32.6579	30.7965	80.6282
Z151_3	39.2mg	ND	ND	ND	86.3945	ND	1.8339	39.0184	ND	0.9732	5.5068	ND	3.0116	ND	8.3166	5852.25	ND	ND	ND	ND	152.819	4.8133	ND	ND	ND	4.6468	26632.1	ND	ND	13.7846	ND	805.21	30.9248	26.61	217.802
Y164_1	41.8mg	ND	ND	ND	25.9408	ND	0.9846	22.3047	ND	1.1125	1.5166	ND	0.6589	ND	8.0402	10697.7	ND	ND	ND	ND	125.227	6.6908	ND	ND	ND	9.7793	122113	ND	ND	12.3813	ND	910.265	25.0804	20.7007	387.224
Y164_2	40.2mg	ND	ND	ND	12.1115	ND	0.1431	6.1376	ND	1.1707	0.09076	ND	1.4791	ND	7.5548	10422	ND	ND	ND	ND	139.663	4.0212	ND	ND	ND	ND	2.02786e+06	ND	ND	13.5072	ND	3411.15	10.7633	11.3098	301.536
Y164_3	39.6mg	ND	ND	ND	11.6038	ND	0.2295	9.6866	ND	1.0393	0.2143	ND	2.8537	ND	11.7421	12002.2	ND	ND	ND	ND	173.215	6.3483	ND	ND	3.8492	ND	51983.4	ND	ND	5.8124	ND	602.5	13.1884	13.0308	287.497
The background of the results within the limit of quantification is colorless, the results below the lowest limit of quantification are labeled gray, and the results above the highest limit of quantification are labeled pink

## Sheet: Plant hormone content statistic
	IPA	IP	TZR	CZ	TZ	Me-IAA	IAA	ACC	ABA	GA7	GA24	JA-Ile	SAG	GA8	SA	ICA	ICAId	OPDA
	Unit（ng/g）	Unit（ng/g）	Unit（ng/g）	Unit（ng/g）	Unit（ng/g）	Unit（ng/g）	Unit（ng/g）	Unit（ng/g）	Unit（ng/g）	Unit（ng/g）	Unit（ng/g）	Unit（ng/g）	Unit（ng/g）	Unit（ng/g）	Unit（ng/g）	Unit（ng/g）	Unit（ng/g）	Unit（ng/g）
Z151	49.8684	1.5066	22.4025	1.0983	4.4466	0.8946	6.1987	4855.91	107.175	2.908	3.837	15.1595	21390.8	10.6739	410.736	23.7379	20.9141	59.5178
	60.2054	1.8042	35.6805	1.2377	6.0687	1.0308	12.1831	5372.98	126.398	2.865	ND	3.8353	23227.7	4.9212	761.376	32.6579	30.7965	80.6282
	86.3945	1.8339	39.0184	0.9732	5.5068	3.0116	8.3166	5852.25	152.819	4.8133	ND	4.6468	26632.1	13.7846	805.21	30.9248	26.61	217.802
	65.4894	1.7149	32.3671	1.10307	5.3407	1.64567	8.89947	5360.38	128.797	3.52877	3.837	7.88053	23750.2	9.79323	659.107	29.1069	26.1069	119.316
Y164	25.9408	0.9846	22.3047	1.1125	1.5166	0.6589	8.0402	10697.7	125.227	6.6908	ND	9.7793	122113	12.3813	910.265	25.0804	20.7007	387.224
	12.1115	0.1431	6.1376	1.1707	0.09076	1.4791	7.5548	10422	139.663	4.0212	ND	ND	2.02786e+06	13.5072	3411.15	10.7633	11.3098	301.536
	11.6038	0.2295	9.6866	1.0393	0.2143	2.8537	11.7421	12002.2	173.215	6.3483	3.8492	ND	51983.4	5.8124	602.5	13.1884	13.0308	287.497
	16.552	0.4524	12.7096	1.1075	0.60722	1.6639	9.11237	11040.6	146.035	5.68677	3.8492	9.7793	733987	10.567	1641.31	16.344	15.0138	325.419
	0.252744	0.263805	0.392671	1.00402	0.113697	1.01108	1.02392	2.05967	1.13384	1.61155	1.00318	1.24094	30.9044	1.07901	2.4902	0.561518	0.575089	2.72737

## Sheet: Plant hormone concentration
Group	Sample volume	MEJA	6-BA	Kt	IPA	BR	IP	TZR	MT	CZ	TZ	DZ	Me-IAA	IBA	IAA	ACC	GR24	GA3	GA1	GA4	ABA	GA7	GA5	GA19	GA24	JA-Ile	SAG	GA51	JA	GA8	DHJA	SA	ICA	ICAId	OPDA
		Unit（ng/mL）	Unit（ng/mL）	Unit（ng/mL）	Unit（ng/mL）	Unit（ng/mL）	Unit（ng/mL）	Unit（ng/mL）	Unit（ng/mL）	Unit（ng/mL）	Unit（ng/mL）	Unit（ng/mL）	Unit（ng/mL）	Unit（ng/mL）	Unit（ng/mL）	Unit（ng/mL）	Unit（ng/mL）	Unit（ng/mL）	Unit（ng/mL）	Unit（ng/mL）	Unit（ng/mL）	Unit（ng/mL）	Unit（ng/mL）	Unit（ng/mL）	Unit（ng/mL）	Unit（ng/mL）	Unit（ng/mL）	Unit（ng/mL）	Unit（ng/mL）	Unit（ng/mL）	Unit（ng/mL）	Unit（ng/mL）	Unit（ng/mL）	Unit（ng/mL）	Unit（ng/mL）
Z151_1	40.9mg	ND	ND	ND	1.3597	ND	0.04108	0.6108	ND	0.02995	0.1212	ND	0.02439	ND	0.169	132.405	ND	ND	ND	ND	2.9223	0.07929	ND	ND	0.1046	0.4133	58.3256	ND	ND	0.291	ND	11.1994	0.6473	0.5703	1.6229
Z151_2	39.3mg	ND	ND	ND	1.5774	ND	0.04727	0.9348	ND	0.03243	0.159	ND	0.02701	ND	0.3192	140.772	ND	ND	ND	ND	3.3116	0.07506	ND	ND	ND	0.1005	60.8565	ND	ND	0.1289	ND	19.9481	0.8556	0.8069	2.1125
Z151_3	39.2mg	ND	ND	ND	2.2578	ND	0.04793	1.0197	ND	0.02543	0.1439	ND	0.0787	ND	0.2173	152.939	ND	ND	ND	ND	3.9937	0.1258	ND	ND	ND	0.1214	69.5986	ND	ND	0.3602	ND	21.0428	0.8082	0.6954	5.6919
					1.73163	#DIV/0!	0.0454267	0.8551	#DIV/0!	0.02927	0.141367	#DIV/0!	0.0433667	#DIV/0!	0.235167	142.038	#DIV/0!	#DIV/0!	#DIV/0!	#DIV/0!	3.4092	0.0933833	#DIV/0!	#DIV/0!	0.1046	0.211733	62.9269	#DIV/0!	#DIV/0!	0.260033	#DIV/0!	17.3968	0.770367	0.690867	3.14243
Y164_1	41.8mg	ND	ND	ND	0.7229	ND	0.02744	0.6216	ND	0.031	0.04226	ND	0.01836	ND	0.2241	298.11	ND	ND	ND	ND	3.4897	0.1865	ND	ND	ND	0.2725	340.287	ND	ND	0.345	ND	25.366	0.6989	0.5769	10.7907
Y164_2	40.2mg	ND	ND	ND	0.3246	ND	0.003836	0.1645	ND	0.03138	0.002432	ND	0.03964	ND	0.2025	279.308	ND	ND	ND	ND	3.743	0.1078	ND	ND	ND	ND	5434.68	ND	ND	0.362	ND	91.4189	0.2885	0.3031	8.0812
Y164_3	39.6mg	ND	ND	ND	0.3063	ND	0.006059	0.2557	ND	0.02744	0.005657	ND	0.07534	ND	0.31	316.857	ND	ND	ND	ND	4.5729	0.1676	ND	ND	0.1016	ND	137.236	ND	ND	0.1534	ND	15.906	0.3482	0.344	7.5899
					0.451267	#DIV/0!	0.012445	0.347267	#DIV/0!	0.02994	0.016783	#DIV/0!	0.0444467	#DIV/0!	0.245533	298.092	#DIV/0!	#DIV/0!	#DIV/0!	#DIV/0!	3.9352	0.153967	#DIV/0!	#DIV/0!	0.1016	0.2725	1970.73	#DIV/0!	#DIV/0!	0.2868	#DIV/0!	44.2303	0.4452	0.408	8.8206
